# Supplementary material
Source: PubMed Central journal article supplement (PMC3999301)
Supplement: NIHMS535383-supplement-01.pdf [file NIHMS535383-supplement-01.pdf]

## Altered Gamma-Aminobutyric Acid Type B Receptor Subunit 1 Receptor Splicing In Alcoholics

### Supplemental Information

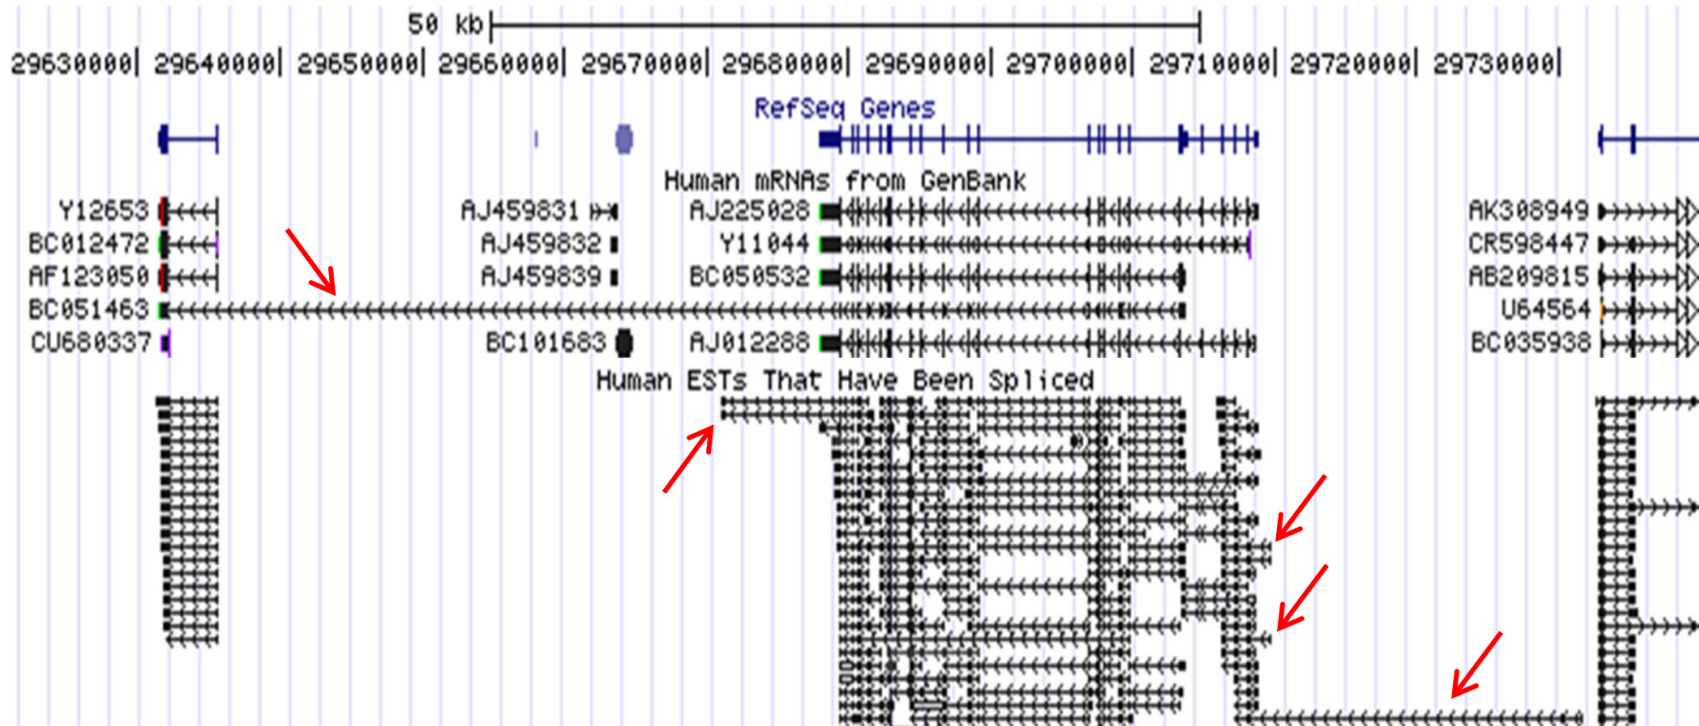

**Figure S1. GABAB1 gene boundary based on UCSC genome browser database.** From two databases of the UCSC genome browser (human mRNAs from GeneBank and human ESTs that have been spliced), we estimated a minimum GABAB1 gene length of 100,266 bp (chr6: 29,631,387 - 29,731,652). From top to bottom the tracks include RefSeq Genes, human mRNAs from GeneBank, and human ESTs that have been spliced. GABAB1 gene is at the center of RefSeq Genes tract, and its 5' end exons are located to the right side of the tract. Red arrows point to clones that showed extended GABAB1 gene length from the two UCSC genome browser databases. GABAB1, gamma-aminobutyric acid type B receptor subunit 1; UCSC, University of California, Santa Cruz; EST, expressed sequence tag.

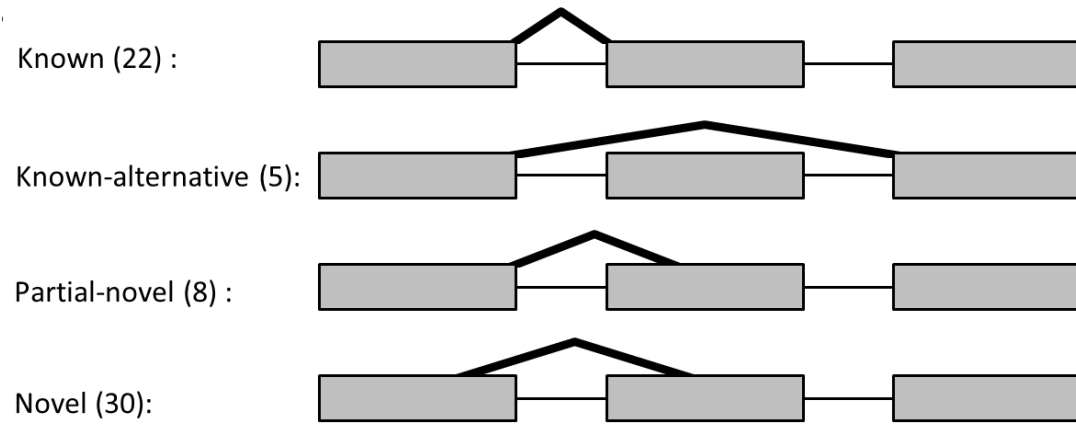

**Figure S2. Four types of GABAB1 splicing junctions.** The 65 splice junctions were one of four types (known, known-alternative, partial-novel, and novel splice junctions). “Known” represents the known splice junctions from the RefSeq Genes model. “Known-alternative” represents splice junctions that have different splicing site combinations of the known splice junctions. “Partial-novel” represents splice junctions that have only one known splicing site and an unknown splicing site. “Novel” represents junctions that do not have any known splicing sites. The numbers in parentheses are counts of each type. The known splice junctions are about one third of the other GABAB1 splice junctions. GABAB1, gamma-aminobutyric acid type B receptor subunit 1.

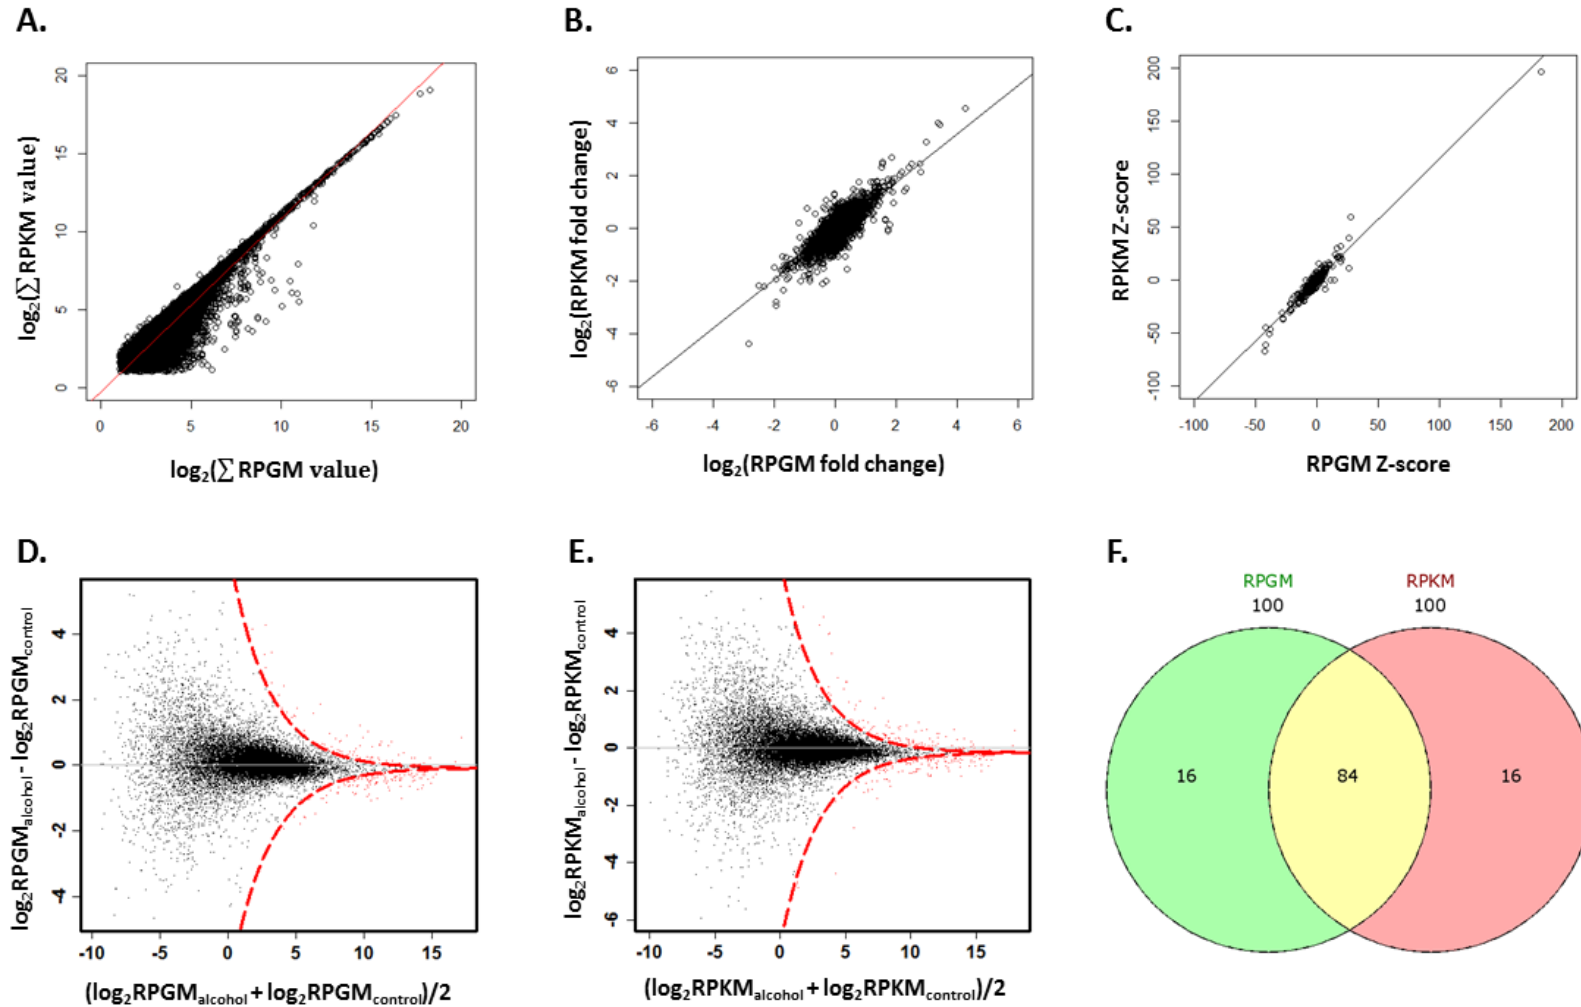

**Figure S3. Expression comparison of genome wide transcripts in alcoholic brains using RPGM and RPKM values.** (A) Expression level of RPGM and RPKM values are compared. X- and Y- axes represents  $\log_2$  transformed sum of RPGM and RPKM values, respectively. (B) RPGM and RPKM fold change were compared. All fold change values are  $\log_2$  transformed. X- axis is for RPGM fold change, and Y-axis is for RPKM fold change. (C) Z-scores of RPGM and RPKM values are compared. X- and Y- axes are Z-scores from DEGseq using RPGM and RPKM, respectively. (D) Genome wide transcript expression changes were compared

in alcoholic brains using RPGM. From RPGM values of all transcripts based on the RefSeq Genes model, we compared transcript expression levels between alcoholic and control groups. X-axis represents the averages of  $\log_2$  RPGM values for alcoholic and control groups. Y-axis is for differences between the values. **(E)** Based on RPKM, genome wide transcripts expression changes were also compared in alcoholic samples. Like RPGM calculation, RPKM values were calculated for all transcripts based on the RefSeq Genes model, and their expression changes in alcoholic brains were examined. X-axis is for the averages of  $\log_2$  RPKM values for alcoholic and control groups, and Y-axis represents differences between the values. Both RPGM and RPKM data showed similar patterns from MA plot analyses using DEGseq package. The significantly changed transcripts were 0.74% and 0.99% at A and B, respectively ( $p$ -values  $< 0.001$ ). Red dots represent expression changes in alcoholic group, and the red dotted lines are  $p$ -values  $< 0.001$ . **(F)** The top 100 significantly changed transcripts were compared between RPGM and RPKM. RPGM, reads per kilobase of gene model per million mapped reads; RPKM, reads per kilobase of exon model per million mapped reads.

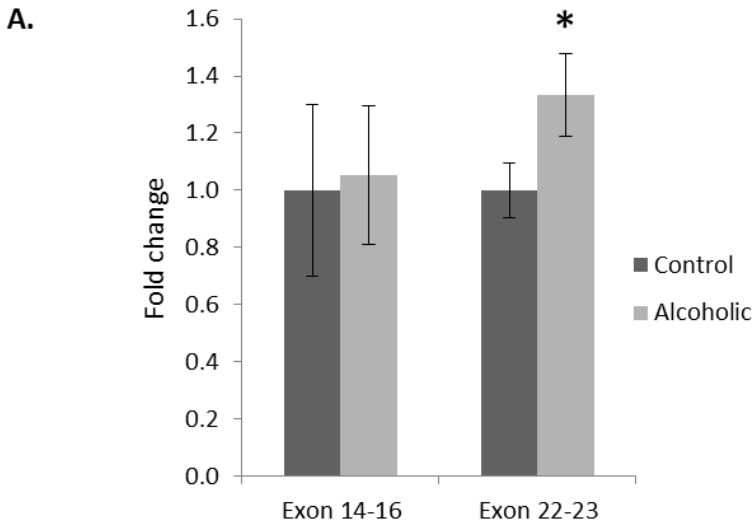

|             |        |        |
|-------------|--------|--------|
| Fold change | 1.05   | 1.33   |
| p-value     | 0.4486 | 0.0309 |

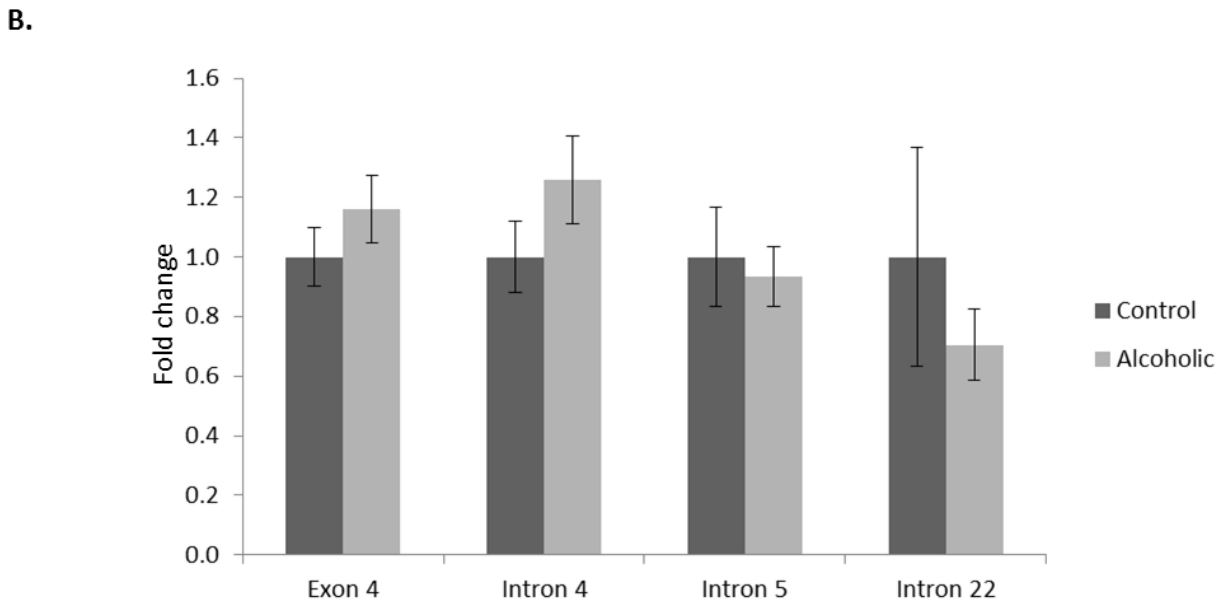

|             |        |        |        |        |
|-------------|--------|--------|--------|--------|
| Fold change | 1.16   | 1.26   | 0.93   | 0.71   |
| p-value     | 0.1433 | 0.0903 | 0.3740 | 0.2419 |

**Figure S4. Quantitative real-time PCR data for GABAB1 splicing junctions and exons/introns.** (A) Quantitative real-time PCR was performed on GABAB1 splice junctions found from RNA-seq. The increase in RPJM expression of exons 22-23 and no change in

expression of exons 14-16 was similar to our RNA-seq data. **(B)** To validate RPGM data for exons and introns, we did further quantitative real-time PCR validation. As seen in our RNA-seq data, exon 4, intron 4, intron 5, and intron 22 showed no expression changes. One-tailed unpaired Student's *t*-tests were performed between alcoholic and control groups. Data are expressed as the mean  $\pm$  SEM. PCR, polymerase chain reaction; GABAB1, gamma-aminobutyric acid type B receptor subunit 1; RPJM, reads per kilobase of splice junction model per million uniquely mapped reads; RPGM, reads per kilobase of gene model per million mapped reads.

**Table S1. Sample information.**

| <b>Sample</b> | <b>Age</b> | <b>Gender</b> | <b>Brain pH</b> | <b>RIN</b> | <b>PMI (hr)</b> | <b>Classification (DSMIV for Alcoholics)</b> |
|---------------|------------|---------------|-----------------|------------|-----------------|----------------------------------------------|
| cSFC209       | 37         | Male          | 5.25            | 6.1        | 11.0            | Control                                      |
| cSFC228       | 59         | Male          | 6.56            | 6.9        | 20.0            | Control                                      |
| cSFC232       | 48         | Male          | 6.71            | 8.7        | 17.0            | Control                                      |
| cSFC257       | 58         | Male          | 6.46            | 7.6        | 12.0            | Control                                      |
| cSFC295       | 34         | Male          | 6.73            | 6.5        | 20.5            | Control                                      |
| cSFC329       | 48         | Male          | 6.73            | 7.3        | 24.0            | Control                                      |
| cSFC339       | 56         | Male          | 6.76            | 6.5        | 37.0            | Control                                      |
| cSFC366       | 69         | Male          | 6.60            | 7.2        | 16.0            | Control                                      |
| cSFC377       | 78         | Male          | 6.20            | 7.4        | 6.5             | Control                                      |
| cSFC442       | 63         | Male          | 6.94            | 7.0        | 24.0            | Control                                      |
| cSFC451       | 73         | Male          | 6.80            | 6.3        | 48.0            | Control                                      |
| cSFC459       | 64         | Male          | 6.94            | 8.3        | 9.5             | Control                                      |
| cSFC463       | 73         | Male          | 6.82            | 5.7        | 51.0            | Control                                      |
| cSFC474       | 41         | Male          | 6.96            | 7.2        | 48.0            | Control                                      |
| cSFC477       | 52         | Female        | 6.21            | 2.3        | 11.0            | Control                                      |
| aSFC204       | 46         | Female        | 6.50            | 6.4        | 27.0            | Alcoholic                                    |
| aSFC210       | 51         | Male          | 5.58            | 7.4        | 27.0            | Alcoholic                                    |
| aSFC217       | 79         | Male          | 6.34            | 7.5        | 48.0            | Alcoholic                                    |
| aSFC234       | 39         | Male          | 6.56            | 8.3        | 24.0            | Alcoholic                                    |
| aSFC260       | 70         | Male          | 6.34            | 5.4        | 19.0            | Alcoholic                                    |
| aSFC303       | 67         | Male          | 6.40            | 6.2        | 48.0            | Alcoholic                                    |
| aSFC313       | 70         | Male          | 6.82            | 6.4        | 62.0            | Alcoholic                                    |
| aSFC315       | 52         | Male          | 6.78            | 5.8        | 45.5            | Alcoholic                                    |
| aSFC327       | 59         | Female        | 6.63            | 7.5        | 22.0            | Alcoholic                                    |
| aSFC330       | 53         | Male          | 6.75            | 5.4        | 57.0            | Alcoholic                                    |
| aSFC332       | 41         | Male          | 6.70            | 6.4        | 54.0            | Alcoholic                                    |
| aSFC351       | 42         | Male          | 6.50            | 5.8        | 41.0            | Alcoholic                                    |
| aSFC430       | 43         | Male          | 6.29            | 5.2        | 29.0            | Alcoholic                                    |
| aSFC476       | 60         | Male          | 6.48            | 7.3        | 16.5            | Alcoholic                                    |

PMI, post-mortem interval; RIN, RNA integrity number.

**Table S2. Mapping statistics of gene specific library and whole transcriptome library.**

|                                                     | <b>Gene specific library</b> | <b>Whole transcriptome library</b> |
|-----------------------------------------------------|------------------------------|------------------------------------|
| Mapped reads                                        | 2,542,338                    | 2,314,525                          |
| GABAB1 specific reads                               | 37,739                       | 249                                |
| GABAB1 specific splice<br>junction containing reads | 1,076                        | 18                                 |

GABAB1, gamma-aminobutyric acid type B receptor subunit 1.



**Table S3. Mapping statistics of whole transcriptome libraries for 15 control and 14 alcoholic human subjects.**

| Sample                       | cSFC209    | cSFC228    | cSFC232    | cSFC257    | cSFC295    | cSFC329    | cSFC339    | cSFC366    | cSFC377    | cSFC442    | cSFC451    | cSFC459    | cSFC463    | cSFC474    | cSFC477    |
|------------------------------|------------|------------|------------|------------|------------|------------|------------|------------|------------|------------|------------|------------|------------|------------|------------|
| Raw reads                    | 33,094,843 | 35,343,212 | 18,581,068 | 38,888,111 | 36,224,909 | 83,654,681 | 36,663,941 | 22,449,165 | 11,911,746 | 32,833,007 | 35,882,930 | 40,277,699 | 48,561,631 | 25,737,53  | 34,263,844 |
| Quality filter               | 26,632,535 | 24,225,746 | 15,668,505 | 32,749,659 | 28,681,117 | 70,114,358 | 29,285,931 | 17,992,194 | 10,075,364 | 26,096,695 | 28,305,869 | 33,316,350 | 40,821,155 | 21,519,617 | 25,889,478 |
|                              | 80.47%     | 68.54%     | 84.33%     | 84.22%     | 79.18%     | 83.81%     | 79.88%     | 80.15%     | 84.58%     | 79.48%     | 78.88%     | 82.72%     | 84.06%     | 83.61%     | 75.56%     |
| ncRNA and adaptor filter (a) | 18,267,859 | 12,356,032 | 11,638,800 | 24,390,013 | 17,750,765 | 57,245,003 | 21,713,129 | 10,383,532 | 6,886,818  | 17,876,790 | 21,322,125 | 25,701,722 | 24,003,408 | 16,197,374 | 10,611,480 |
|                              | 55.20%     | 34.96%     | 62.64%     | 62.72%     | 49.00%     | 68.43%     | 59.22%     | 46.25%     | 57.82%     | 54.45%     | 59.42%     | 63.81%     | 49.43%     | 62.93%     | 30.97%     |
| Unique mapped reads (b)      | 7,866,682  | 4,165,394  | 4,867,740  | 10,981,783 | 7,290,526  | 27,434,260 | 8,444,624  | 4,349,063  | 3,087,588  | 7,190,915  | 7,682,991  | 12,082,894 | 11,115,208 | 6,969,258  | 4,992,016  |
|                              | 23.77%     | 11.79%     | 26.20%     | 28.24%     | 20.13%     | 32.79%     | 23.03%     | 19.37%     | 25.92%     | 21.90%     | 21.41%     | 30.00%     | 22.89%     | 27.08%     | 14.57%     |
| (b)/(a)                      | 43.06%     | 33.71%     | 41.82%     | 45.03%     | 41.07%     | 47.92%     | 38.89%     | 41.88%     | 44.83%     | 40.22%     | 36.03%     | 47.01%     | 46.31%     | 43.03%     | 47.04%     |

  

| Sample                       | aSFC204    | aSFC210    | aSFC217    | aSFC234    | aSFC260     | aSFC303    | aSFC313    | aSFC315    | aSFC327    | aSFC330    | aSFC332    | aSFC351    | aSFC430    | aSFC476    |
|------------------------------|------------|------------|------------|------------|-------------|------------|------------|------------|------------|------------|------------|------------|------------|------------|
| Raw reads                    | 27,821,439 | 26,047,363 | 14,566,308 | 21,984,169 | 126,588,851 | 36,030,714 | 52,006,412 | 34,642,762 | 90,749,179 | 32,384,057 | 35,020,905 | 38,226,079 | 29,939,449 | 25,688,439 |
| Quality filter               | 21,406,081 | 21,840,200 | 12,404,367 | 18,367,384 | 99,273,661  | 27,099,685 | 37,856,724 | 27,081,823 | 75,869,348 | 26,756,321 | 27,865,908 | 25,866,170 | 23,554,695 | 21,218,728 |
|                              | 76.94%     | 83.85%     | 85.16%     | 83.55%     | 78.42%      | 75.21%     | 72.79%     | 78.17%     | 83.60%     | 82.62%     | 79.57%     | 67.67%     | 78.67%     | 82.60%     |
| ncRNA and adaptor filter (a) | 13,609,570 | 14,751,500 | 9,144,836  | 12,710,443 | 71,410,465  | 12,952,198 | 24,532,333 | 18,495,269 | 45,739,200 | 19,094,716 | 17,724,874 | 19,449,128 | 17,347,506 | 15,598,453 |
|                              | 48.92%     | 56.63%     | 62.78%     | 57.82%     | 56.41%      | 35.95%     | 47.17%     | 53.39%     | 50.40%     | 58.96%     | 50.61%     | 50.88%     | 57.94%     | 60.72%     |
| Unique mapped reads (b)      | 5,364,440  | 6,617,476  | 4,022,523  | 5,315,184  | 32,701,183  | 5,051,370  | 4,546,158  | 6,862,433  | 12,282,055 | 8,108,307  | 7,473,312  | 6,860,571  | 7,612,834  | 7,027,911  |
|                              | 19.28%     | 25.41%     | 27.62%     | 24.18%     | 25.83%      | 14.02%     | 8.74%      | 19.81%     | 13.53%     | 25.04%     | 21.34%     | 17.95%     | 25.43%     | 27.36%     |
| (b)/(a)                      | 39.42%     | 44.86%     | 43.99%     | 41.82%     | 45.79%      | 39.00%     | 18.53%     | 37.10%     | 26.85%     | 42.46%     | 42.16%     | 35.27%     | 43.88%     | 45.06%     |

Under the read numbers, ratios were calculated from raw reads. (b)/(a) represented the ratio of unique mapped reads (b) to ncRNA and adaptor filter (a).

**Table S4. GABAB1 exon and intron expression changes in alcoholic brains.**

| <b>Exon /<br/>intron</b> | <b>Ctl<br/>RPGM</b> | <b>Alc<br/>RPGM</b> | <b>Fold<br/>change</b> | <b><i>p</i>-value</b> | <b>q-value<br/>(Benjamini <i>et al.</i> (1))</b> |
|--------------------------|---------------------|---------------------|------------------------|-----------------------|--------------------------------------------------|
| exon 7                   | 21.04               | 32.55               | 1.47                   | 9.39E-08              | 5.38E-06                                         |
| exon 8                   | 29.97               | 43.33               | 1.38                   | 2.30E-07              | 1.18E-05                                         |
| exon 10                  | 85.77               | 71.20               | 0.79                   | 2.33E-08              | 1.55E-06                                         |
| exon 11                  | 21.23               | 28.21               | 1.27                   | 1.68E-03              | 2.15E-02                                         |
| exon 12                  | 46.58               | 55.94               | 1.14                   | 9.58E-03              | 8.28E-02                                         |
| exon 14                  | 76.44               | 105.48              | 1.31                   | 2.99E-12              | 4.55E-10                                         |
| exon 15                  | 62.25               | 86.05               | 1.32                   | 2.30E-10              | 2.43E-08                                         |
| exon 16                  | 34.81               | 53.71               | 1.47                   | 9.02E-12              | 1.24E-09                                         |
| exon 17                  | 6.63                | 4.37                | 0.63                   | 3.72E-03              | 4.02E-02                                         |
| exon 19                  | 25.44               | 32.64               | 1.22                   | 3.76E-03              | 4.06E-02                                         |
| exon 22                  | 30.74               | 37.44               | 1.16                   | 1.96E-02              | 1.41E-01                                         |

Ctl RPGM and Alc RPGM are the RPGM means of control group and alcoholic group, respectively.

GABAB1, gamma-aminobutyric acid type B receptor subunit 1; RPGM, reads per kilobase of gene model per million mapped reads.

**Table S5. GABAB1 splice junction changes in alcoholic brains.**

| Location                       | Type  | Exon / intron     | Ctl<br>RPJM | Alc<br>RPJM | Fold<br>change | <i>p</i> -value | q-value<br>(Benjamini <i>et al.</i> (1)) | q-value<br>(Storey <i>et al.</i> (2)) |
|--------------------------------|-------|-------------------|-------------|-------------|----------------|-----------------|------------------------------------------|---------------------------------------|
| chr6:29,699,781-<br>29,703,241 | Known | exon 6 - exon 7   | 5.72        | 10.88       | 1.71           | 5.42E-05        | 7.27E-04                                 | 3.67E-04                              |
| chr6:29,699,232-<br>29,699,645 | Known | exon 7 - exon 8   | 5.69        | 9.64        | 1.52           | 2.20E-03        | 1.39E-02                                 | 7.03E-03                              |
| chr6:29,697,574-<br>29,697,859 | Known | exon 9 - exon 10  | 20.71       | 16.38       | 0.71           | 6.90E-05        | 8.86E-04                                 | 4.48E-04                              |
| chr6:29,697,049-<br>29,697,507 | Known | exon 10 - exon 11 | 9.17        | 7.32        | 0.72           | 9.83E-03        | 4.26E-02                                 | 2.15E-02                              |
| chr6:29,689,242-<br>29,696,856 | Known | exon 11 - exon 12 | 16.76       | 25.42       | 1.36           | 1.76E-04        | 1.91E-03                                 | 9.65E-04                              |
| chr6:29,686,758-<br>29,688,306 | Known | exon 13 - exon 14 | 36.87       | 61.99       | 1.51           | 2.31E-14        | 2.73E-12                                 | 1.38E-12                              |
| chr6:29,684,490-<br>29,684,984 | Known | exon 15 - exon 16 | 15.45       | 22.22       | 1.29           | 3.31E-03        | 1.91E-02                                 | 9.64E-03                              |
| chr6:29,682,975-<br>29,684,356 | Known | exon 16 - exon 17 | 0.75        | 0.16        | 0.19           | 8.63E-03        | 3.88E-02                                 | 1.96E-02                              |
| chr6:29,680,745-<br>29,681,324 | Known | exon 20 - exon 21 | 0.09        | 0.72        | 6.89           | 8.20E-03        | 3.73E-02                                 | 1.89E-02                              |
| chr6:29,679,473-<br>29,680,249 | Known | exon 22 - exon 23 | 1.73        | 4.64        | 2.40           | 7.35E-05        | 9.34E-04                                 | 4.72E-04                              |
| chr6:29,679,072-<br>29,679,179 | Novel | exon 23           | 0.60        | 0.18        | 0.27           | 4.13E-02        | 1.20E-01                                 | 6.05E-02                              |

Ctl RPJM and Alc RPJM are the RPJM means of control group and alcoholic group, respectively.

GABAB1, gamma-aminobutyric acid type B receptor subunit 1; RPJM, reads per kilobase of splice junction model per million uniquely mapped reads.

**Table S6. Known splicing junction change of GABAB signaling pathway genes.**

| Gene name    | Gene length (bp) | Number of known splicing junction change | Number of known splicing junction change. / gene length (Kb) |
|--------------|------------------|------------------------------------------|--------------------------------------------------------------|
| GABAB1       | 30,958           | 10                                       | 0.323                                                        |
| GABAB2       | 420,810          | 11                                       | 0.026                                                        |
| KCNJ3(GIRK1) | 157,922          | 1                                        | 0.006                                                        |
| KCNJ5(GIRK4) | 26,639           | 0                                        | 0.000                                                        |
| GNAI1        | 84,586           | 2                                        | 0.024                                                        |
| GNB1         | 105,767          | 7                                        | 0.066                                                        |

**Supplemental References**

1. Benjamini Y, Hochberg Y (1995): Controlling the False Discovery Rate - a Practical and Powerful Approach to Multiple Testing. *J Roy Stat Soc B Met.* 57:289-300.
2. Storey JD (2003): The positive false discovery rate: A Bayesian interpretation and the q-value. *Ann Stat.* 31:2013-2035.
